# Supplementary material for: A Small-Scale Qualitative Study of Early Comprehensive Patient Engagement in Acute Clinical Settings: Is It Feasible?
Source: Research Square preprint supplement (doi:10.21203/rs.3.rs-78222/v1), 2020-11-11
Supplement: Supplementary file 1 [file 078f555f529ca55c30e93800.docx]

**Interview guide:** **A small-scale qualitative study of early comprehensive patient engagement in acute clinical settings: is it feasible?**

**Briefing /introduction**

- Presentation of the interviewer and purpose of the interview
- Frame of the interview
- Informed consent

**Interview**

- 1. In your words, what is patient engagement?
  2. How do you engage patients in your work? And in what situations?
  3. Describe one or more situations in your daily work where patient engaged was successful in your experience.
     1. And describe situations where patient engagement was not successful in your experience.
  4. Several user-engagement tools have been developed. What are your thoughts on the tool that I have presented to you?
  5. Do you see yourself using the presented tool in your daily work? And why / why not?

1. What are the advantages and disadvantages of using the tool in the ED?
   1. What do you believe it takes for the tool to be usable in the ED?

**Debriefing**
